# Supplementary material
Source: HighWire-hosted journal article supplement (https://jvi.asm.org/content/suppl/2012/04/17/86.10.5422)
Supplement: TableS5.pdf [file TableS5.pdf]

**Supplementary TABLE 5. Characteristics of the patient population.**

| <b>Subject ID</b> | <b>Age (months)</b> | <b>Ethnicity - Race</b> | <b>Sex</b> | <b>Condition</b> | <b>Disease score</b> |
|-------------------|---------------------|-------------------------|------------|------------------|----------------------|
| 53                | 9.2                 | Caucasian               | M          | RSV              | 4                    |
| 56                | 2.0                 | Hispanic                | F          | RSV              | 7                    |
| 119               | 6.6                 | Hispanic                | M          | RSV              | 8                    |
| 126               | 7.9                 | Hispanic                | M          | RSV              | 13                   |
| 127               | 2.6                 | Hispanic                | F          | RSV              | 8                    |
| 134               | 1.2                 | African-american        | M          | RSV              | 13                   |
| 137               | 1.7                 | Hispanic                | M          | RSV              | 15                   |
| 138               | 2.2                 | Hispanic                | M          | RSV              | 1                    |
| 140               | 3.2                 | African-american        | M          | RSV              | 1                    |
| 141               | 31.5                | Hispanic                | F          | RSV              | 4                    |
| 142               | 13.6                | Hispanic                | F          | RSV              | 4                    |
| 144               | 3.8                 | African-american        | M          | RSV              | 8                    |
| 145               | 2.8                 | Hispanic                | M          | RSV              | 1                    |
| 231               | 8.7                 | Hispanic                | M          | RSV              | 2                    |
| 234               | 1.4                 | Other                   | M          | RSV              | 3                    |
| 236               | 5.2                 | Hispanic                | F          | RSV              | 5                    |
| 238               | 0.7                 | Hispanic                | M          | RSV              | 13                   |
| 240               | 0.9                 | Caucasian               | M          | RSV              | 13                   |
| 243               | 1.8                 | Hispanic                | F          | RSV              | 9                    |
| 246               | 0.9                 | Hispanic                | F          | RSV              | 1                    |
| 280               | 1.9                 | Hispanic                | F          | RSV              | 2                    |
| 283               | 3.5                 | Hispanic                | F          | RSV              | 2                    |
| 285               | 4.0                 | Hispanic                | M          | RSV              | 1                    |
| 292               | 1.8                 | White                   | F          | RSV              | 1                    |
| 296               | 1.6                 | Black                   | M          | RSV              | 2                    |
| 307               | 2.9                 | Other                   | F          | RSV              | 9                    |
| 312               | 1.5                 | Hispanic                | F          | RSV              | 7                    |
| 313               | 1.8                 | Hispanic                | M          | RSV              | 14                   |
| 314               | 1.7                 | Hispanic                | F          | RSV              | 4                    |
| 317               | 1.4                 | Hispanic                | F          | RSV              | 14                   |
| 322               | 2.5                 | Black                   | F          | RSV              | 2                    |
| 324               | 0.9                 | Hispanic                | F          | RSV              | 13                   |
| 443               | 16.7                | Black                   | F          | RSV              | 6                    |
| 492               | 1.2                 | Caucasian               | M          | RSV              | 7                    |
| 495               | 0.9                 | Hispanic                | M          | RSV              | 6                    |
| 497               | 2.3                 | Hispanic                | F          | RSV              | 15                   |
| 498               | 8.4                 | Black                   | F          | RSV              | 15                   |
| 499               | 1.6                 | Black                   | M          | RSV              | 2                    |

|     |      |                  |   |                 |     |
|-----|------|------------------|---|-----------------|-----|
| 501 | 2.4  | Black            | M | RSV             | 1   |
| 506 | 0.5  | Hispanic         | M | RSV             | 6   |
| 508 | 4.4  | Hispanic         | M | RSV             | 7   |
| 510 | 0.7  | Hispanic         | F | RSV             | 0   |
| 511 | 2.0  | Hispanic         | F | RSV             | 2   |
| 514 | 0.3  | Hispanic         | F | RSV             | 2   |
| 515 | 2.6  | Hispanic         | F | RSV             | 1   |
| 516 | 2.1  | Hispanic         | F | RSV             | 1   |
| 526 | 1.9  | Caucasian        | M | RSV             | 3   |
| 528 | 1.7  | Hispanic         | F | RSV             | 0   |
| 545 | 2.0  | African-american | F | RSV             | 6   |
| 546 | 9.7  | Other            | M | RSV             | 1   |
| 569 | 13.8 | Caucasian        | F | RSV             | 7   |
| 19N | 3    | Hispanic         | M | Control for RSV | N/A |
| 25N | 11   | Hispanic         | F | Control for RSV | N/A |
| 27N | 10   | Caucasian        | M | Control for RSV | N/A |
| 162 | 5    | Caucasian        | F | Control for RSV | N/A |
| 174 | 8    | African-american | M | Control for RSV | N/A |
| 392 | 10   | Black            | M | Control for RSV | N/A |
| 409 | 6    | Caucasian        | M | Control for RSV | N/A |
| 462 | 0.5  | Hispanic         | M | Control for RSV | N/A |
| 482 | 7.5  | Hispanic         | M | Control for RSV | N/A |
| 483 | 6    | Hispanic         | F | Control for RSV | N/A |
| 87  | 19   | Hispanic         | F | Influenza       | 3   |
| 92  | 1.25 | Hispanic         | F | Influenza       | 0   |
| 95  | 48   | Hispanic         | M | Influenza       | 1   |
| 101 | 4    | Hispanic         | M | Influenza       | 13  |
| 104 | 17   | Hispanic         | M | Influenza       | 1   |
| 105 | 48   | Hispanic         | F | Influenza       | 1   |
| 107 | 1.5  | Other            | M | Influenza       | 0   |
| 108 | 5    | Hispanic         | M | Influenza       | 2   |
| 112 | 0.75 | Hispanic         | M | Influenza       | 1   |
| 114 | 18   | African-american | F | Influenza       | 2   |
| 128 | 11   | Hispanic         | F | Influenza       | 5   |
| 132 | 6    | Hispanic         | M | Influenza       | 13  |

|     |      |                  |   |                       |     |
|-----|------|------------------|---|-----------------------|-----|
| 259 | 4    | Hispanic         | F | Influenza             | 5   |
| 311 | 1.25 | Hispanic         | M | Influenza             | 1   |
| 320 | 0.5  | Hispanic         | F | Influenza             | 0   |
| 517 | 18   | Hispanic         | F | Influenza             | 5   |
| 519 | 1.5  | Hispanic         | F | Influenza             | 2   |
| 524 | 72   | Hispanic         | M | Influenza             | 2   |
| 527 | 1.5  | Black            | M | Influenza             | 1   |
| 530 | 4.5  | Hispanic         | M | Influenza             | 2   |
| 532 | 1.25 | Hispanic         | F | Influenza             | 2   |
| 533 | 132  | Caucasian        | F | Influenza             | 1   |
| 536 | 24   | Hispanic         | F | Influenza             | 1   |
| 540 | 0.75 | Hispanic         | M | Influenza             | 1   |
| 542 | 0.5  | Hispanic         | F | Influenza             | 2   |
| 553 | 18   | Caucasian        | F | Influenza             | N/A |
| 560 | 120  | Black            | F | Influenza             | N/A |
| 572 | 48   | Hispanic         | M | Influenza             | N/A |
| 391 | 18   | Caucasian        | F | Control for Influenza | N/A |
| 392 | 10   | Black            | M | Control for Influenza | N/A |
| 397 | 20   | Hispanic         | M | Control for Influenza | N/A |
| 403 | 28   | Caucasian        | M | Control for Influenza | N/A |
| 408 | 24   | Caucasian        | M | Control for Influenza | N/A |
| 414 | 13   | Hispanic         | F | Control for Influenza | N/A |
| 3N  | 72   | Hispanic         | M | Control for Influenza | N/A |
| 7N  | 19   | African-american | F | Control for Influenza | N/A |
| 19N | 3    | Hispanic         | M | Control for Influenza | N/A |
| 25N | 11   | Hispanic         | F | Control for Influenza | N/A |
| 27N | 10   | Caucasian        | M | Control for Influenza | N/A |
| 45  | 48   | Other            | F | Control for Influenza | N/A |
